# Supplementary material for: Effects of Acupuncture on Cardiac Remodeling in Patients with Persistent Atrial Fibrillation: Results of a Randomized, Placebo-Controlled, Patient- and Assessor-Blinded Pilot Trial and Its Implications for Future Research
Source: MDPI journal article supplement (doi:10.3390/medicina58010041), 2021-12-27
Supplement: s1 [file s1]

**Supplement Table S2. Details of Acupuncture Points\* in Active and Sham Acupuncture Treatment**

| Active acupuncture treatment |      | Sham acupuncture treatment                                                        |
|------------------------------|------|-----------------------------------------------------------------------------------|
| EA                           | PC5  | lateral 1.5 cm to PC5 (between PC and LU meridians)                               |
|                              | PC6  | lateral 1.5 cm to PC6 (between PC and LU meridians)                               |
|                              | ST36 | lateral 2 cm to ST36 (between ST and GB meridians)                                |
|                              | ST37 | lateral 2 cm to ST37 (between ST and GB meridians)                                |
| IDA                          | HT7  | lateral to the 2 <sup>nd</sup> extensor digitorum tendon<br>(between TE4 and LI5) |
|                              | TF4  | between the jaw point and clavicle point in ear acupuncture                       |

\* Acupuncture point PC5 refers to the 5<sup>th</sup> point of pericardium meridian, and ear acupuncture points have different nomenclature (e.g., TF4 means the 4<sup>th</sup> point in triangular fossa).

EA = electroacupuncture; GB = gall bladder; IDA = intradermal acupuncture; LI = large intestine; LU = lung; PC = pericardium; ST = stomach; TE = triple energizer.
